# Supplementary material for: Palbociclib-Induced Cellular Senescence Is Modulated by the mTOR Complex 1 and Autophagy
Source: MDPI journal article supplement (doi:10.3390/ijms24119284), 2023-05-26
Supplement: s1 [file s1]

**Table S1. Genomic analysis of the AGS and MCF-7 cell line.**

| cBioPortal (for cancer genomics)<br>of 2826EXAMPLES ANALYZED |               |               | Altered<br>by<br>10% | Altered<br>by<br>8% | Altered<br>by<br>4% | Altered<br>by<br>9% | Altered<br>by<br>14% | Altered<br>by<br>14% | Altered<br>by<br>12% |
|--------------------------------------------------------------|---------------|---------------|----------------------|---------------------|---------------------|---------------------|----------------------|----------------------|----------------------|
| STUDIO ID                                                    | ID<br>EXAMPLE | PATIENT<br>ID | CCND1                | CDK4                | CDK6                | pRB1                | MTOR                 | RICTOR               | RAPTOR               |
|                                                              |               |               |                      |                     |                     |                     |                      |                      |                      |
| Ccle_broad_2019                                              | STOMACH       | AGS           | No<br>alteration     | No<br>alteration    | No<br>alteration    | No<br>alteration    | No<br>alteration     | No<br>alteration     | No<br>alteration     |
| Cellline_ccle_broad                                          | STOMACH       | AGS           | No<br>alteration     | No<br>alteration    | No<br>alteration    | No<br>alteration    | No<br>alteration     | No<br>alteration     | No<br>alteration     |
|                                                              |               |               |                      |                     |                     |                     |                      |                      |                      |
| Ccle_broad_2019                                              | BREAST        | MCF-7         | No<br>alteration     | No<br>alteration    | No<br>alteration    | No<br>alteration    | No<br>alteration     | No<br>alteration     | No<br>alteration     |
| Cellline_ccle_broad                                          | BREAST        | MCF-7         | No<br>alteration     | No<br>alteration    | No<br>alteration    | No<br>alteration    | No<br>alteration     | No<br>alteration     | No<br>alteration     |

**Data provided by the cBioPortal for cancer genomics.** The data shown correspond to the search in the three databases available on the portal. Of a total of 2,826 cell types analyzed, only some of them have mutations in the genes evaluated. The AGS and MCF-7 cell lines do not have alterations in the interrogated genes.
