# Supplementary material for: Palbociclib-Induced Cellular Senescence Is Modulated by the mTOR Complex 1 and Autophagy
Source: Int J Mol Sci. 2023 May 26;24(11):9284. doi: 10.3390/ijms24119284 (PMC10252531; doi:10.3390/ijms24119284)
Supplement: Supplementary file 1 [file ijms-24-09284-s001.zip]

Archive with 5 entries (5 files):
- Figure S1-AC.tif
- Figure S2-AC.tif
- Figure S3-AC.tif
- Figure S4-AC.tif
- Table S1.pdf
